# Supplementary material for: Interplay of chain dynamics and ion transport on mechanical behavior and conductivity in ionogels
Source: Royal Society of Chemistry journal article supplement (doi:10.1039/d4sm01251h), 2024-12-12
Supplement: d4sm01251h1.pdf [file d4sm01251h1.pdf]

## **Interplay of Chain Dynamics and Ion Transport on Mechanical Behavior and Conductivity in Ionogels**

Mengze Lu<sup>1, 2#</sup>, Wei Zhen Lian<sup>1, 2#</sup>, Zhenhua Xiao<sup>1, 2</sup>, Lu Liu<sup>1, 2</sup>, Zhiwei Fan<sup>1, 2</sup>, Xiaolin Jin<sup>1, 2</sup>,  
Chuanxia Jiang<sup>3</sup>, Chen Qian<sup>4</sup>, Zheng-Hai Tang<sup>5</sup>, Panchao Yin<sup>1, 2</sup>, Taolin Sun<sup>1, 2, 6, 7\*</sup>

<sup>1</sup>South China Advanced Institute for Soft Matter Science and Technology, School of Emergent Soft Matter, South China University of Technology, Guangzhou 510640, China.

<sup>2</sup>Guangdong Provincial Key Laboratory of Functional and Intelligent Hybrid Materials and Devices, South China University of Technology, Guangzhou 510640, China.

<sup>3</sup>Guangdong Marubi Biotechnology Co., Ltd. No 92 Banhe Road, Huangpu District, Guangzhou, 510700, China

<sup>4</sup>School of Materials Science & Engineering, Zhejiang Sci-Tech University, Hangzhou 310018, P. R. China

<sup>5</sup>Department of Polymer Materials and Engineering, South China University of Technology, Guangzhou 510640, China

<sup>6</sup>Guangdong Basic Research Center of Excellence for Energy and Information Polymer Materials, South China University of Technology, Guangzhou 510640, China

<sup>7</sup>State Key Laboratory of Pulp and Paper Engineering, South China University of technology, Guangzhou, Guangzhou 510640, China

\* Email: [suntl@scut.edu.cn](mailto:suntl@scut.edu.cn)

# Equal contributions

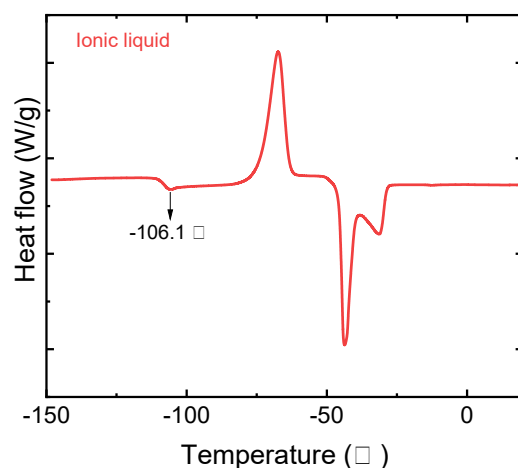

**Figure S1** DSC traces of ionic liquid and P(DMAA-co-MAAc) matrix.

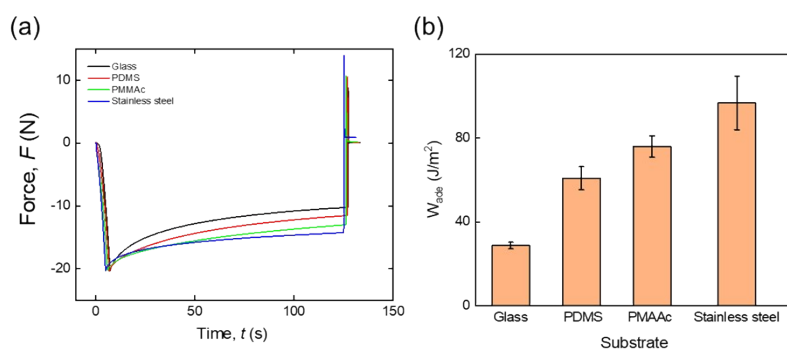

**Figure S2** (a) Debonding force versus time curves on different substrates collected from probe-tack tests. (b) Adhesive energy  $W_{ade}$  of samples on different substrates, including glass, PDMS (Polydimethylsiloxane) and PMMA (Polymethyl methacrylate), and stainless steel.

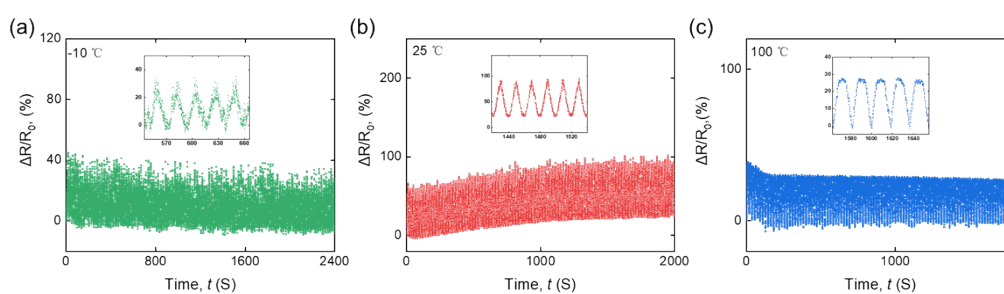

**Figure S3** Resistance changes rate of the flexible strain sensor base on ionogel-0.8 at (a)  $-10\text{ }^{\circ}\text{C}$ , (b)  $25\text{ }^{\circ}\text{C}$ , and (c)  $100\text{ }^{\circ}\text{C}$ .

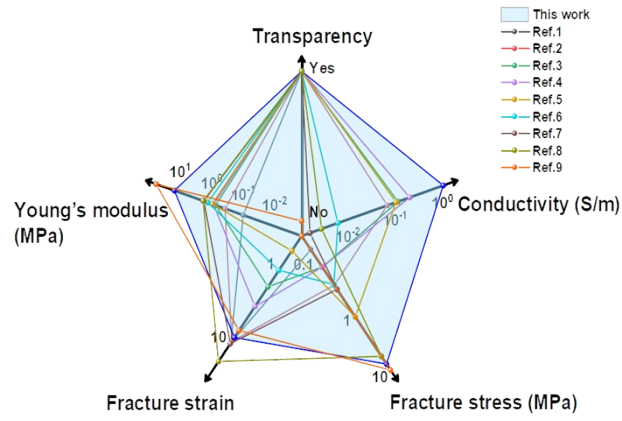

**Figure S4** Rough comparison between this work and previously reported ionogel materials in terms of transparency, conductivity, stretchability, mechanical strength, and toughness<sup>1-9</sup>.

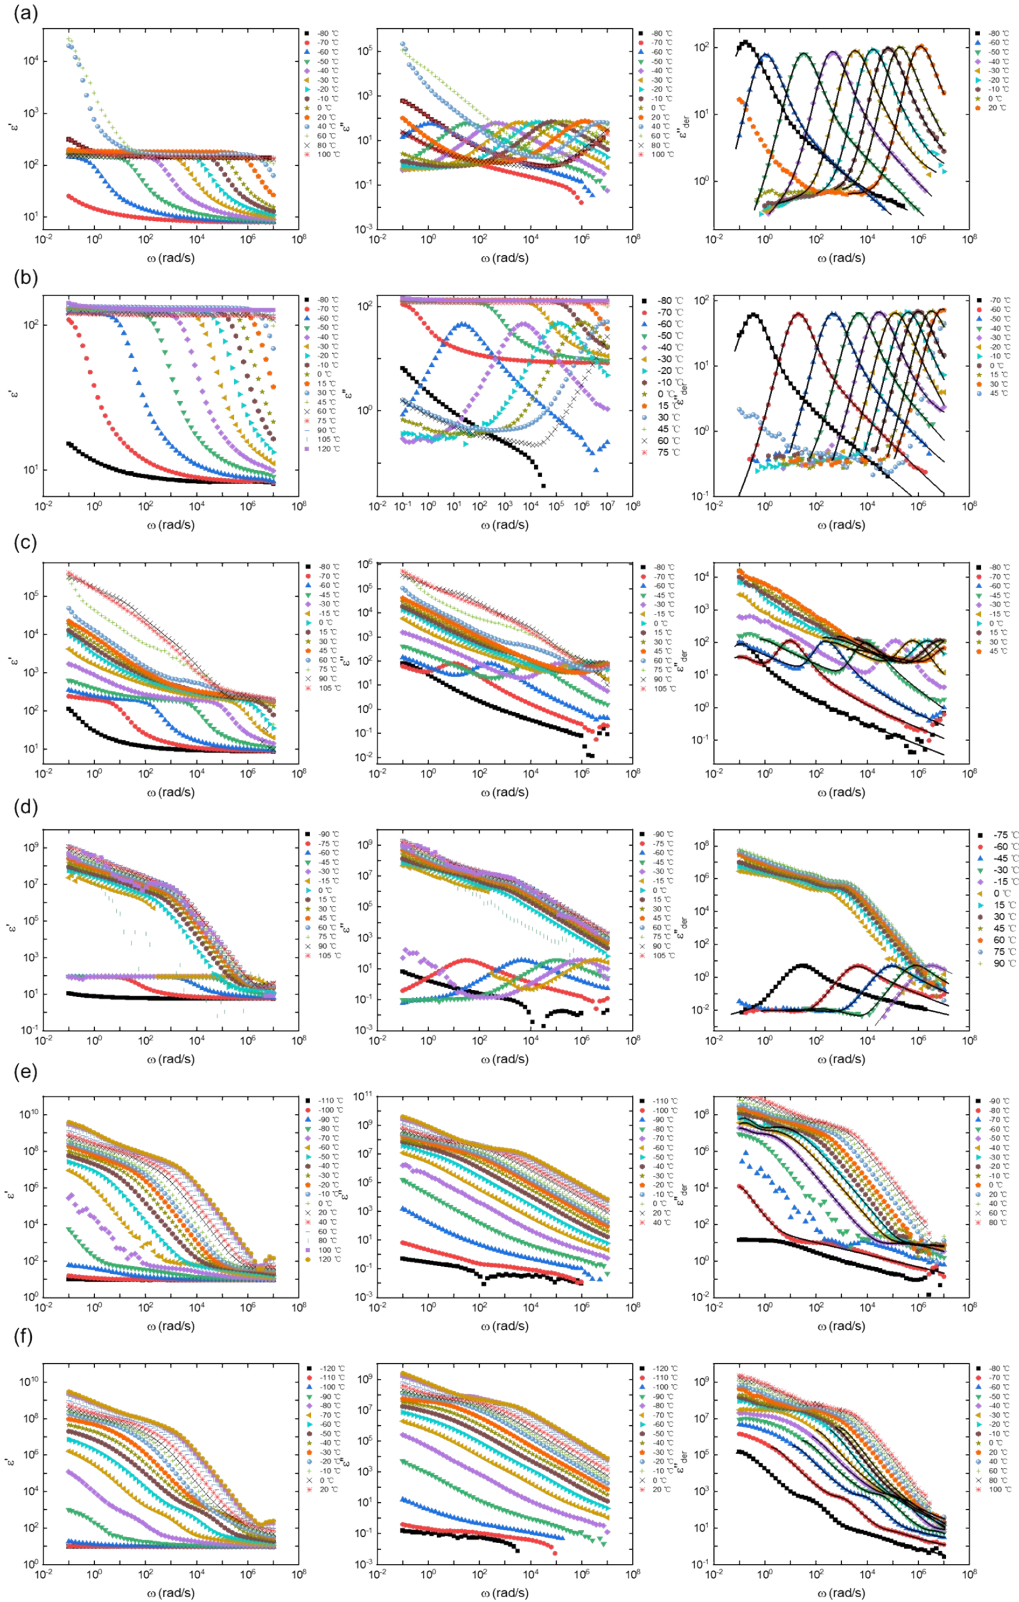

**Figure S5** Isothermal plots of real part,  $\epsilon'$ , imaginary part,  $\epsilon''$  and dc conduction free dielectric loss,  $\epsilon''_{der}$  of the complex permittivity ( $\epsilon^*$ ) as a function of applied frequency, respectively, for (a) ionogel-0.65, (b) ionogel-0.7, (c) ionogel-0.75, (d) ionogel-0.8, (e) ionogel-0.85 and (f) ionogel-0.9. The solid lines through the  $\epsilon''_{der}$  plots show the fitting of experimental data to HN formalism.

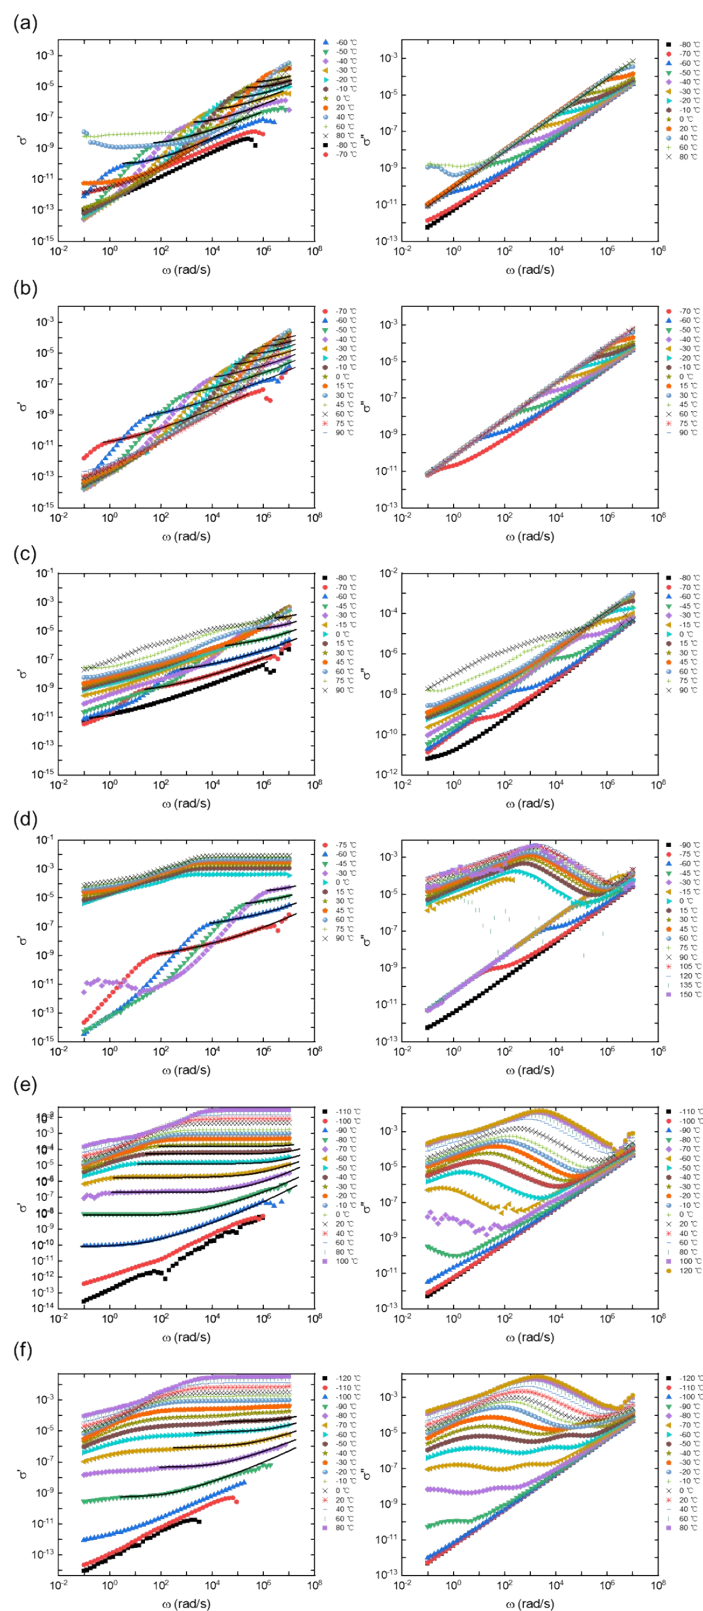

**Figure S6** Isothermal plots of real part,  $\sigma'$  and imaginary part,  $\sigma''$  of the complex conductivity ( $\sigma^*$ ) as a function of applied frequency, respectively, for (a) ionogel-0.65, (b) ionogel-0.7, (c) ionogel-0.75, (d) ionogel-0.8, (e) ionogel-0.85 and (f) ionogel-0.9. The solid lines through the  $\sigma'$  plots show the fitting of experimental data to RBM formalism.

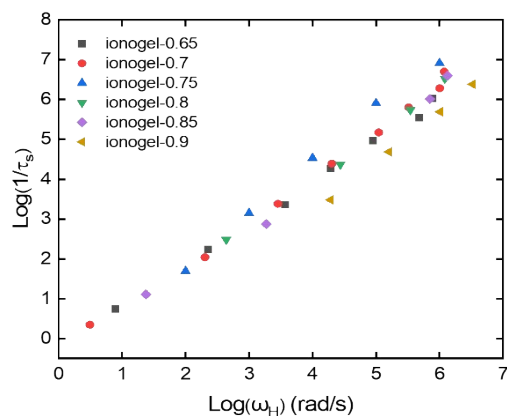

**Figure S7** Plots of the inverse of segment relaxation time ( $1/\tau_s$ ) versus hopping frequency ( $\omega_H$ ) of ionogel-m (m: 0.65-0.9).

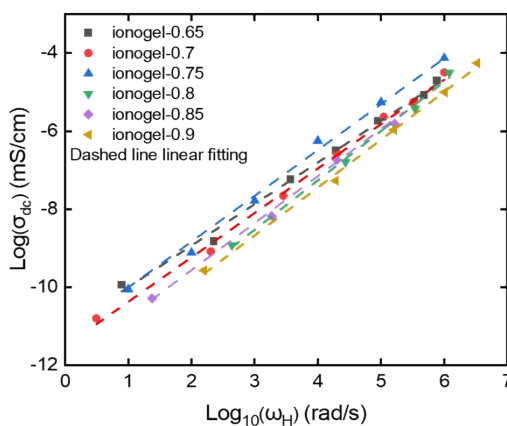

**Figure S8** Plots of dc conduction  $\sigma_{dc}$  vs hopping frequency  $\omega_H$  of these ionogels. The dashed lines represent the linear fitting of ionogel-m (m: 0.65-0.9).

**Table S1** Slope of the plots of dc conduction  $\sigma_{dc}$  vs hopping frequency  $\omega_H$  of ionogel-m (m: 0.65-0.9).

|              | Slope |
|--------------|-------|
| ionogel-0.65 | 1.07  |
| ionogel-0.7  | 1.14  |
| ionogel-0.75 | 1.11  |
| ionogel-0.8  | 1.26  |
| ionogel-0.85 | 1.26  |
| ionogel-0.9  | 1.23  |

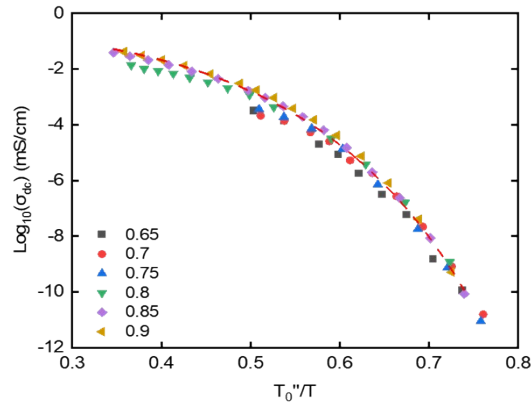

**Figure S9** Normalized inverse of temperature dependent ionic conductivity ( $\sigma^{dc}$ ) using the Vogel temperature  $T_0''$  for all the ionogel-m (m: 0.65-0.9).

**Table S2** WLF fitting constants  $C_1$  and  $C_2$  of temperature dependent the natural logarithmic plot of the horizontal shift factors  $a_T$  of ionogel-0.14-m (m: 0.65-0.9).

|              | $C_1$ | $C_2$  |
|--------------|-------|--------|
| ionogel-0.65 | 9.82  | 260.47 |
| ionogel-0.7  | 10.56 | 160.83 |
| ionogel-0.75 | 11.4  | 242.06 |
| ionogel-0.8  | 10.93 | 231.17 |
| ionogel-0.85 | 3.99  | 175.78 |
| ionogel-0.9  | 1.33  | 131.44 |

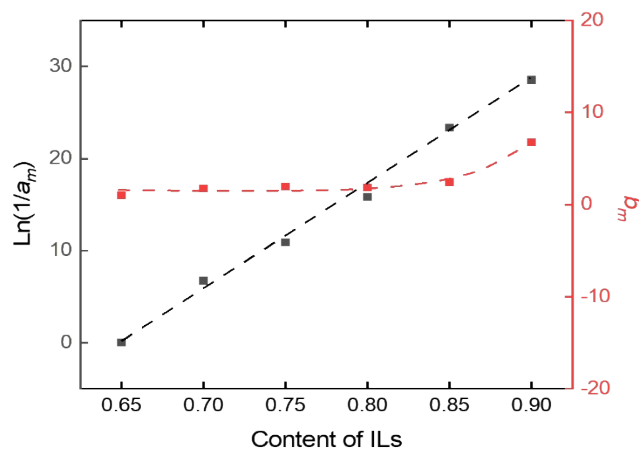

**Figure S10** Time-concentration horizontal shift factor  $a_m$  (black plots) and vertical shift factor  $b_m$  (red plots) as a function of ionic liquid contents m. Reference content  $m=0.65$ .

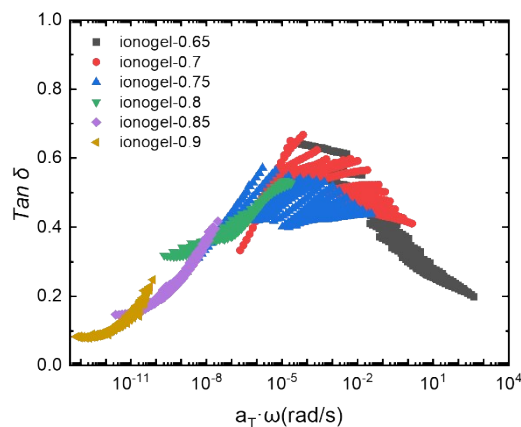

**Figure S11** Loss factor  $Tan \delta (= \frac{G''}{G'})$  following the principle of time-concentration superposition of all the ionogel-m (m: 0.65-0.9).

**Table S3** Vertical shift-factor ( $a_s$ ) of inverse of segmental relaxation time ( $1/\tau_m$ ) of ionogel-0.14-m (m: 0.65-0.9) in Figure 7.

|              | $a_s$ |
|--------------|-------|
| ionogel-0.65 | 4.23  |
| ionogel-0.7  | 6.96  |
| ionogel-0.75 | 9.76  |
| ionogel-0.8  | 11.96 |
| ionogel-0.85 | 11.41 |
| ionogel-0.9  | 8.65  |

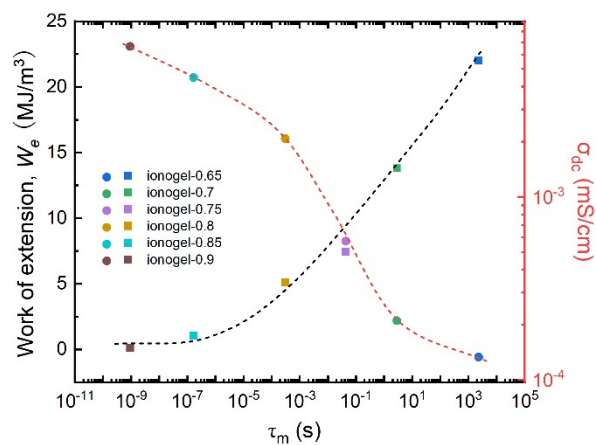

**Figure S12** The relationship between the work of extension and conductivity and segment



relaxation time.

**References:**

1. Yiming B, Han Y, Han Z, et al. A mechanically robust and versatile liquid-free ionic conductive elastomer[J]. *Advanced Materials*, 2021: 2006111.
2. Li R A, Chen G, He M, et al. Patternable transparent and conductive elastomers towards flexible tactile/strain sensors[J]. *Journal of Materials Chemistry C*, 2017, 5 (33): 8475-8481.
3. Ou Y, Zhao T, Zhang Y, et al. Stretchable solvent-free ionic conductor with self-wrinkling microstructures for ultrasensitive strain sensor[J]. *Materials Horizons*, 2022.
4. Kim Y M, Moon H C. Ionoskins: Nonvolatile, highly transparent, ultrastretchable ionic sensory platforms for wearable electronics[J]. *Advanced Functional Materials*, 2020, 30 (4): 1907290.
5. Yiming B, Guo X, Ali N, et al. Ambiently and mechanically stable ionogels for soft ionotropic[J]. *Advanced Functional Materials*, 2021, n/a (n/a): 2102773.
6. Li M, Li J, Na H, et al. Mechanical behavior of poly (methyl methacrylate)-based ionogels[J]. *Soft Matter*, 2014, 10 (40): 7993-8000.
7. Zhang Y, Li M, Qin B, et al. Highly transparent, underwater self-healing, and ionic conductive elastomer based on multivalent ion–dipole interactions[J]. *Chemistry of Materials*, 2020, 32 (15): 6310-6317.
8. Liu J, Chen Z, Chen Y, et al. Ionic conductive organohydrogels with dynamic pattern behavior and multi-environmental stability[J]. *Advanced Functional Materials*, 2021, 31 (24): 2101464.
9. Wang M, Zhang P, Shamsi M, et al. Tough and stretchable ionogels by in situ phase separation[J]. *Nature Materials*, 2022.
